# Supplementary material
Source: Springer Nature journal article supplement (https://www.springermedizin.de/resource/supplementary/12877_2012_845_MOESM3_ESM.pdf/9440532)

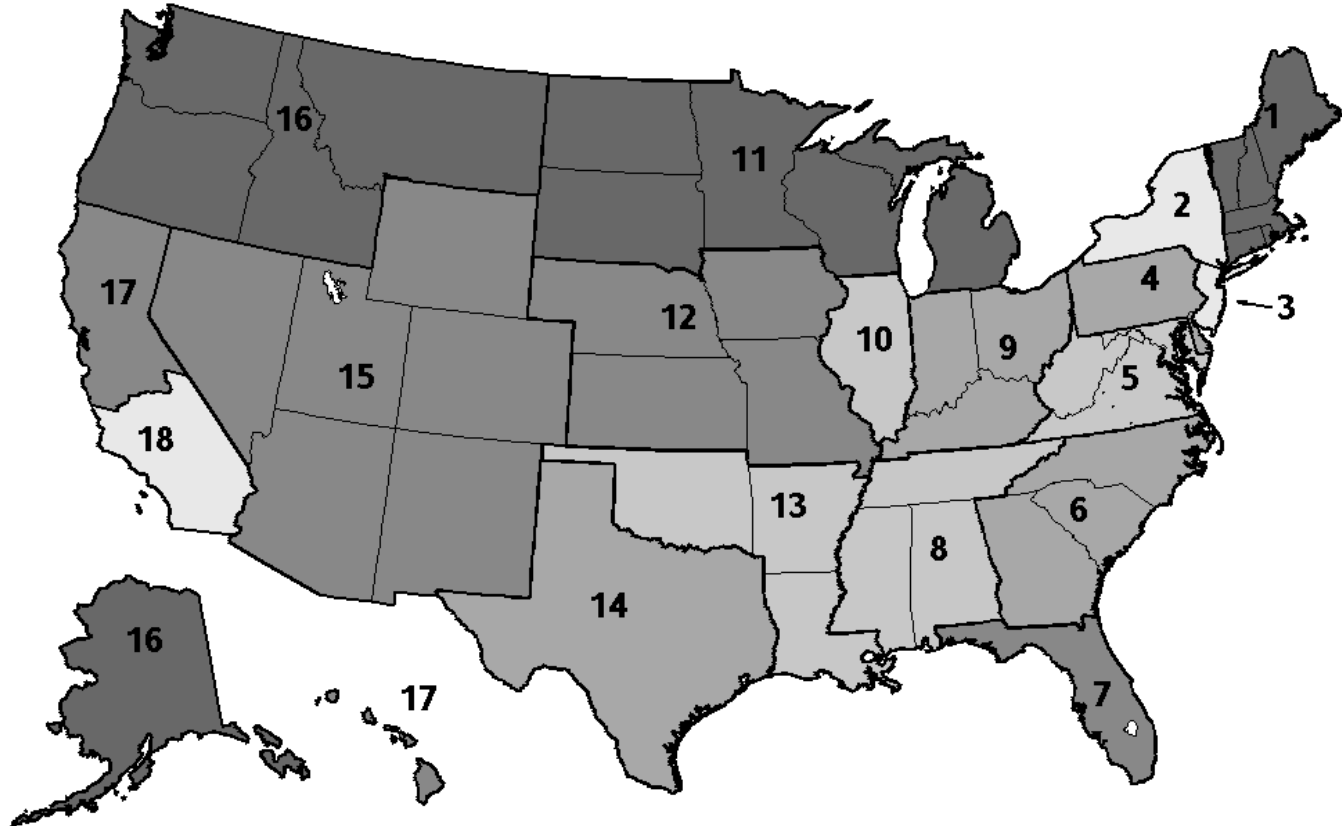

**ESRD Networks:**

- 1 - CT, MA, ME, NH, RI, VT
- 2 - NY
- 3 - NJ
- 4 - DE, PA
- 5 - DC, MD, VA, WV
- 6 - GA, NC, SC
- 7 - FL
- 8 - AL, MS, TN
- 9 - IN, KY, OH
- 10 - IL
- 11 - MI, MN, ND, SD, WI
- 12 - IA, KS, MO, NE
- 13 - AR, LA, OK
- 14 - TX
- 15 - AZ, CO, NM, NV, UT, WY
- 16 - AK, ID, MT, OR, WA
- 17 - HI, No. CA
- 18 - So. CA

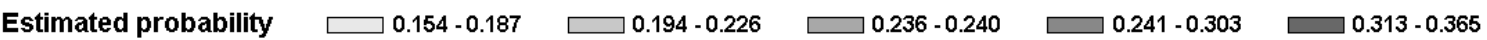

Supplement: MOESM3 [file 9440532]
